# Supplementary material for: Defect-rich MoS2(1−x)Se2x few-layer nanocomposites: a superior anode material for high-performance lithium-ion batteries
Source: Royal Society of Chemistry journal article supplement (doi:10.1039/c8ta11583d), 2019-01-01
Supplement: c8ta11583d1.pdf [file c8ta11583d1.pdf]

Electronic Supplementary Material (ESI) for Journal of Materials Chemistry A.  
This journal is © The Royal Society of Chemistry 2018

## Electronic Supplementary Information

### Defects-rich $\text{MoS}_{2(1-x)}\text{Se}_{2x}$ few layers nanocomposites: a superior anode material for high-performance lithium-ion batteries

Guohui Cai, Lei Peng, Shiyong Ye, Yucheng Huang, Guangfeng Wang\* Xiaojun Zhang\*

*†Key Laboratory of Chem-Biosensing, Anhui province; Key Laboratory of Functional Molecular Solids, Anhui province; College of Chemistry and Materials Science, Anhui Normal University, Wuhu 241000, P. R. China*

#### Experimental section

##### Materials and reagents

Sodium molybdate dihydrate ( $\text{Na}_2\text{MoO}_4 \cdot 2\text{H}_2\text{O}$ ), Thiourea ( $\text{NH}_2\text{CSNH}_2$ ), Selenium dioxide ( $\text{SeO}_2$ ), Sodium borohydride ( $\text{NaBH}_4$ ), Hydrochloric acid (36%-38%), Polyvinylidene fluoride (PVDF), All reagents were of analytical grade, and used without further purification.

Deionized water was supplied with a Millipore Water System (18.25  $\text{M}\Omega$  cm).

##### Synthesis of pure inorganic $\text{MoO}_3$ nanowires

The pure inorganic  $\text{MoO}_3$  nanowires were synthesized via a simple hydrothermal method. In detail, 200 mM of  $\text{Na}_2\text{MoO}_4 \cdot 2\text{H}_2\text{O}$  was dissolved in 70 mL deionized water with magnetic stirring for 30 min. Under vigorously stirring, 5 mL of Hydrochloric acid was slowly added into the solution of  $\text{Na}_2\text{MoO}_4 \cdot 2\text{H}_2\text{O}$  stirring for another 30 min. The mixed solution was then transferred into a Teflon-lined autoclave with 100 mL capacity and maintained at 180 °C for

24 h. After that, the product was collected by centrifugation, and then thoroughly washed three times with water and ethanol.

### **Synthesis of the $\text{MoS}_{2(1-x)}\text{Se}_{2x}$ nanosheets**

The  $\text{MoS}_{2(1-x)}\text{Se}_{2x}$  hybrid was synthesized using the as-prepared pure inorganic  $\text{MoO}_3$  nanowires as precursors. 40 mM  $\text{MoO}_3$  powder was dispersed in the 70mL deionized water with magnetic stirring for 30 min. Then, 1 mL of Hydrochloric acid was slowly added into the solution of  $\text{MoO}_3$  stirring for another 30 min. Successively, 60mM of thiourea and 20 mM  $\text{SeO}_2$  and 80 mM  $\text{NaBH}_4$  was sequentially added to the homogeneous dispersion which was then transferred to a Teflon-lined stainless-steel autoclave and treated at 180 °C for 24 h. The  $\text{MoS}_{2(1-x)}\text{Se}_{2x}$  product was collected by centrifugation and washed with deionized water and ethanol several times and dried in a vacuum oven at 60 °C overnight.

### **Synthesis different selenium-sulfur ratios of the $\text{MoS}_{2(1-x)}\text{Se}_{2x}$ nanosheets**

The synthesis method of different selenium-sulfur ratios of the  $\text{MoS}_{2(1-x)}\text{Se}_{2x}$  nanosheets that of Synthesis  $\text{MoS}_{2(1-x)}\text{Se}_{2x}$ . Only changed the concentration of thiourea and selenium dioxide.

### **Structural characterization**

The phase purities of the samples were characterized by X-ray diffraction (Bruker D8ADVANCE) with irradiation from a Cu target ( $K\alpha$ ,  $\lambda = 0.15406$  nm) under a voltage of 40 KV and a current of 40 mA. The morphologies and sizes of the sample were observed by a field-emission scanning electron microscopy (FESEM, Hitachi S-4800, 5 KV) and transmission electron microscope (TEM, Hitachi HT-7700, 120 KV). X-ray energy dispersive spectroscopy (EDS) was obtained on FESEM. High-resolution transmission electron X-ray

energy dispersive microscopy (HRTEM) images were obtained using a transmission electron microscopy (TEM, FEI TECNAI-G2 200 kV). The Brunauer-Emmett-Teller (BET) tests were determined via a surface analyzer (Micromeritics ASAP 2460). All the as-prepared samples were degassed at 120 °C for 6 h prior to nitrogen adsorption measurements. Laser Raman spectroscopy (Renishaw inVia). X-ray photoelectron spectroscopy (XPS) measurements are performed on an ESCALAB 250 spectrometer (Perkin-Elmer) to characterize the surface chemical composition. The source gun type of the XPS was Al K $\alpha$ .

### **Electrochemical measurements**

For LIBs test, the sample, conductive carbon black and PVDF as a binder were mixed thoroughly in a weight ratio of 8:1:1. The slurry was coated on copper foil and dried in a vacuum oven at 80 °C overnight. The electrolyte was composed of 1 M LiPF<sub>6</sub> in a mixture of ethylene carbonate, diethyl carbonate (EC: DEC=1: 1, in volume). Electrochemical experiments were performed using 2032-type coin cells with Li reference electrode, which were assembled in an argon-filled glove box (Mikrouna, Super (1220/750/900)). The galvanostatic discharge-charge characteristics were tested between the potentials of 0.01 and 3.0 V using a Neware battery tester. Cyclic voltammetry (CV, scanning rate of 0.1 mV s<sup>-1</sup>) and electrochemical impedance spectroscopy (EIS, frequency range from 0.01 Hz to 100 kHz) were tested on a CHI 760D electrochemical workstation.

### **Computational Methods**

First-principles calculations were performed in the framework of density functional theory (DFT) as implemented in the Vienna ab initio simulation package (VASP).<sup>16,17</sup> The electron-ion interactions were described by the projector-augmented plane wave (PAW) method.<sup>18</sup>

The generalized gradient approximation (GGA) was used for the exchange-correlation functional with the Perdew-Burke-Ernzerhof (PBE) parameterization.<sup>19,20</sup> The cutoff energy for the plane-wave basis was set to 400 eV. The convergence thresholds were set to  $10^{-5}$  eV and  $10^{-2}$  eV/Å for energy and force, respectively. Vacuum height was set to 15 Å along z direction to avoid the interactions between two periodic repeating units. The Brillouin zone was represented by a Monkhorst-Pack<sup>21</sup> special k-point mesh of  $5 \times 5 \times 1$  for geometry optimizations, whereas a larger grid of  $7 \times 7 \times 1$  was used for band structure computations.

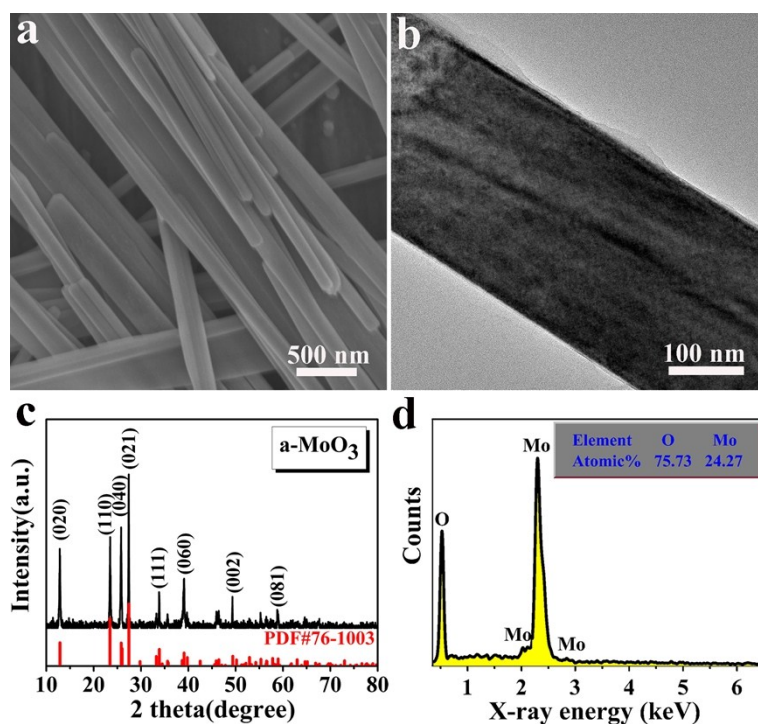

**Figure S1** a,b) FESEM and HRTEM images, c,d) XRD and EDX pattern of the MoO<sub>3</sub> nanorods.

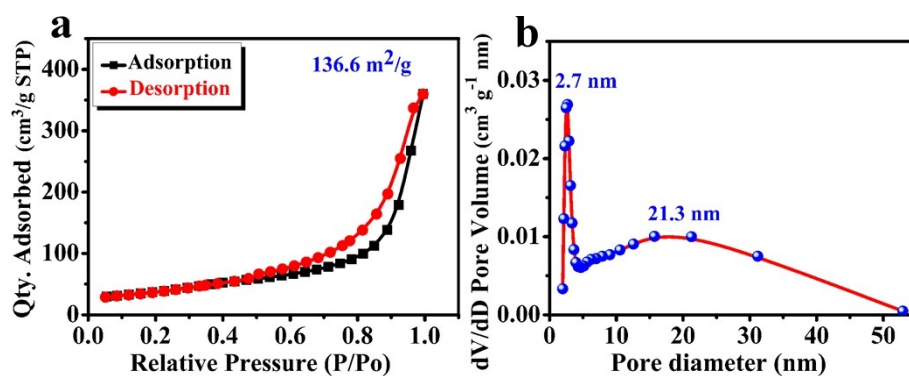

**Figure S2** a,b)  $\text{N}_2$  adsorption/desorption isotherm and the corresponding pore-size distribution plot of the  $\text{MoS}_{2(1-x)}\text{Se}_{2x}$  ( $x=0.25$ ) nanosheets.

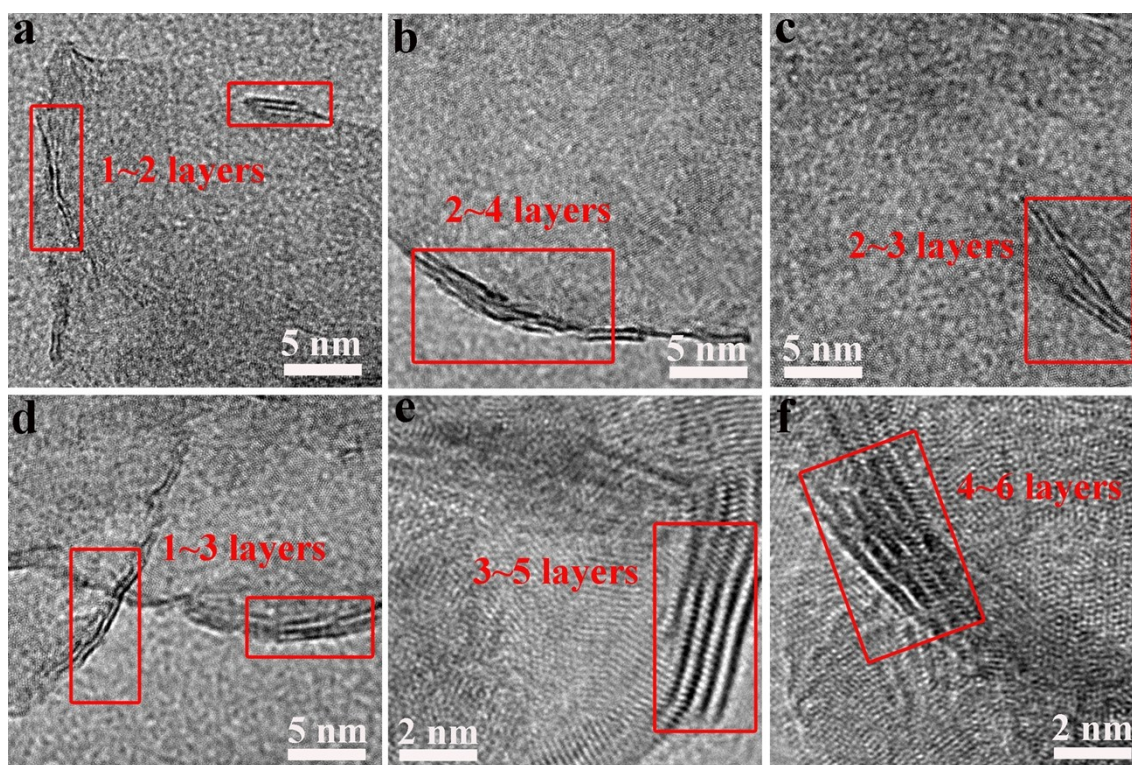

**Figure S3** a-f) HRTEM showing different layers of the  $\text{MoS}_{2(1-x)}\text{Se}_{2x}$  ( $x=0.25$ ) nanosheets.

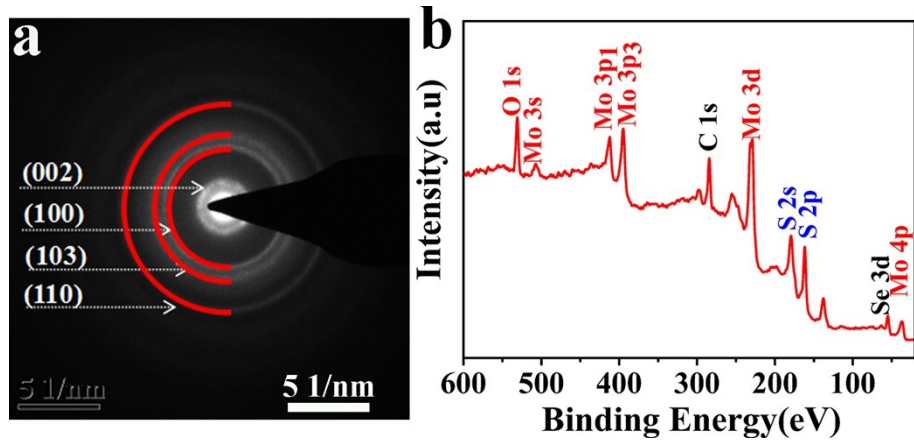

**Figure S4** a,b) SAED pattern and XPS full spectra of the  $\text{MoS}_{2(1-x)}\text{Se}_{2x}$  ( $x=0.25$ ) nanosheets.

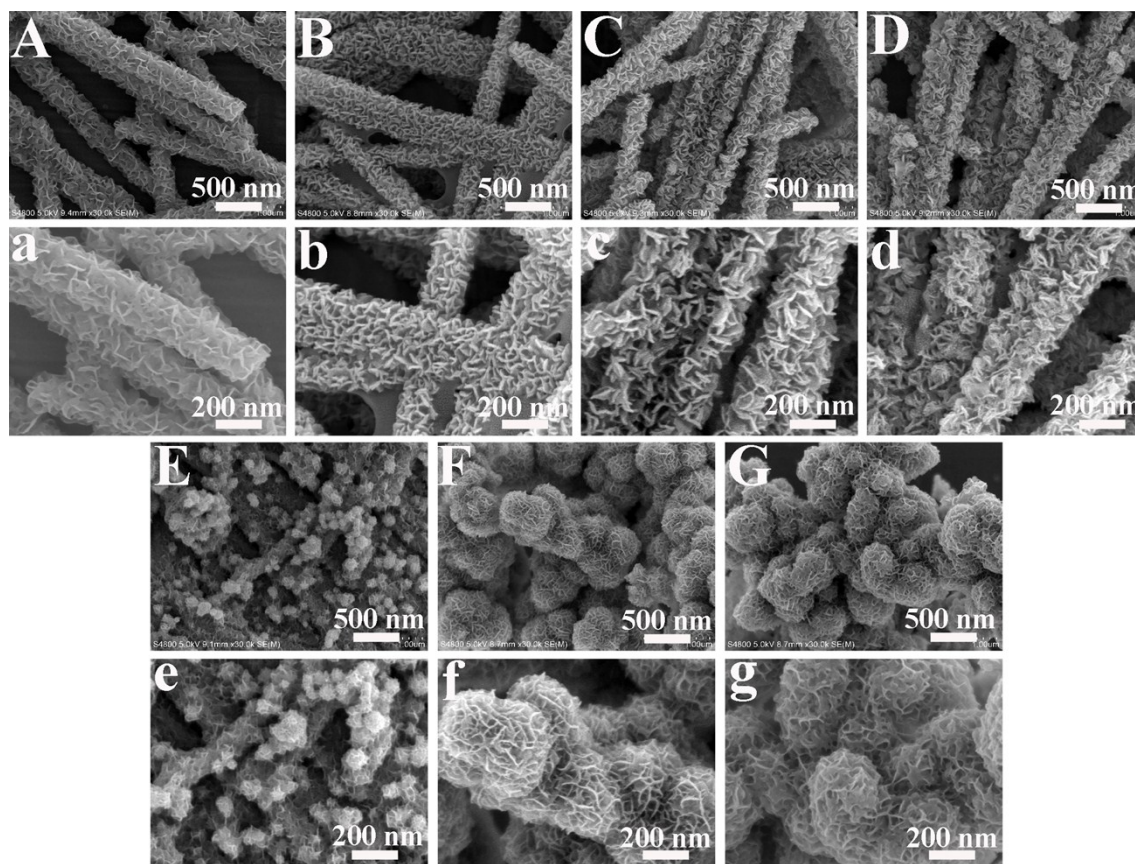

**Figure S5** SEM images of  $\text{MoS}_{2(1-x)}\text{Se}_{2x}$  nanosheets with different selenium content for A,a)  $x=0$  (S/Se=2:0), B,b)  $x=0.05$  (S/Se=19:1), C,c)  $x=0.2$  (S/Se=4:1), D,d)  $x=0.25$  (S/Se=3:1), E,e)  $x=0.35$  (S/Se $\approx$ 2:1), F,f)  $x=0.5$  (S/Se=1:1) G,g)  $x=1$  (S/Se=0:2).

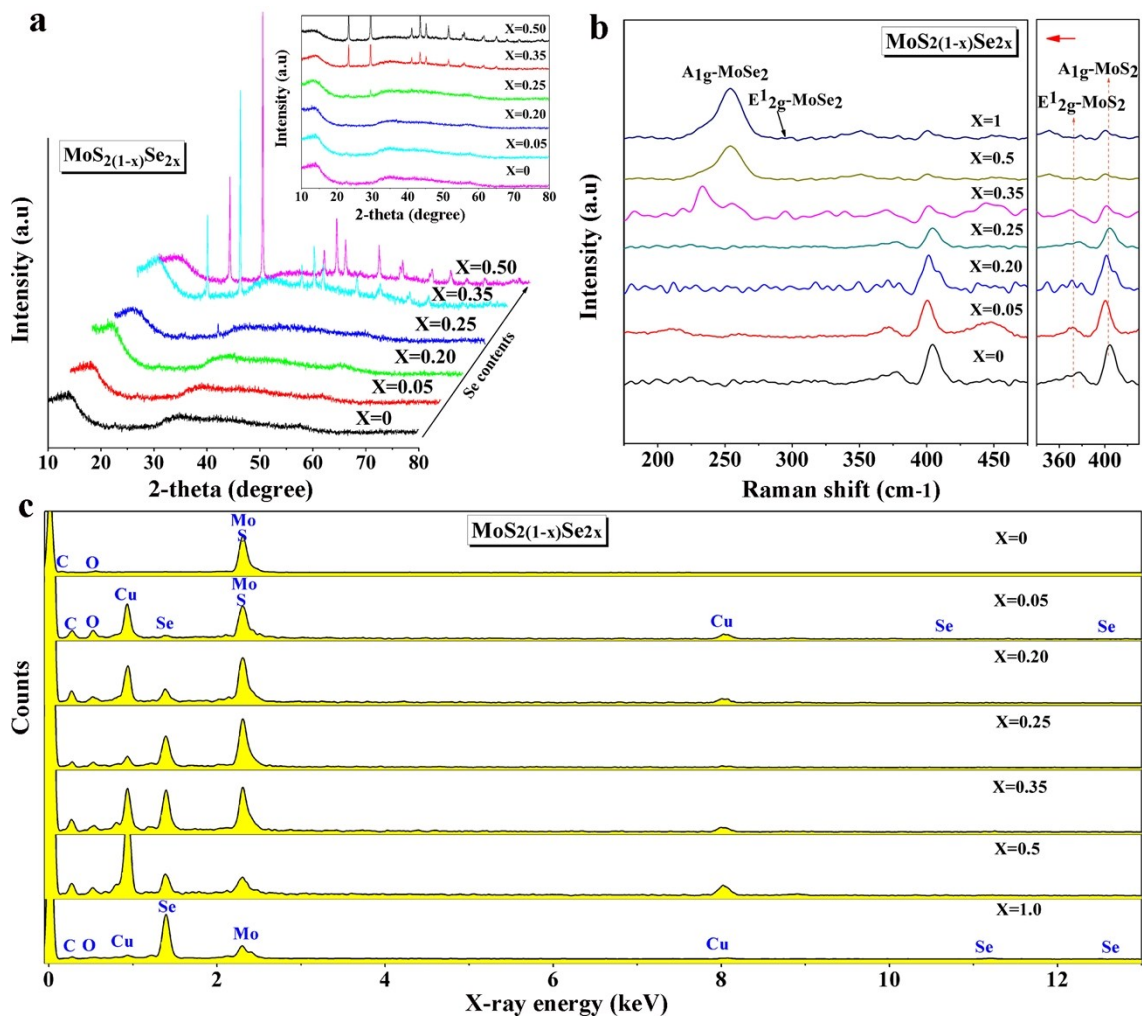

**Figure S6** a) XRD, b) RS, c) EDX spectrum (C, O and Cu elements are coming from the Cu grid) of the different selenium content of the  $\text{MoS}_2(1-x)\text{Se}_{2x}$  nanosheets.



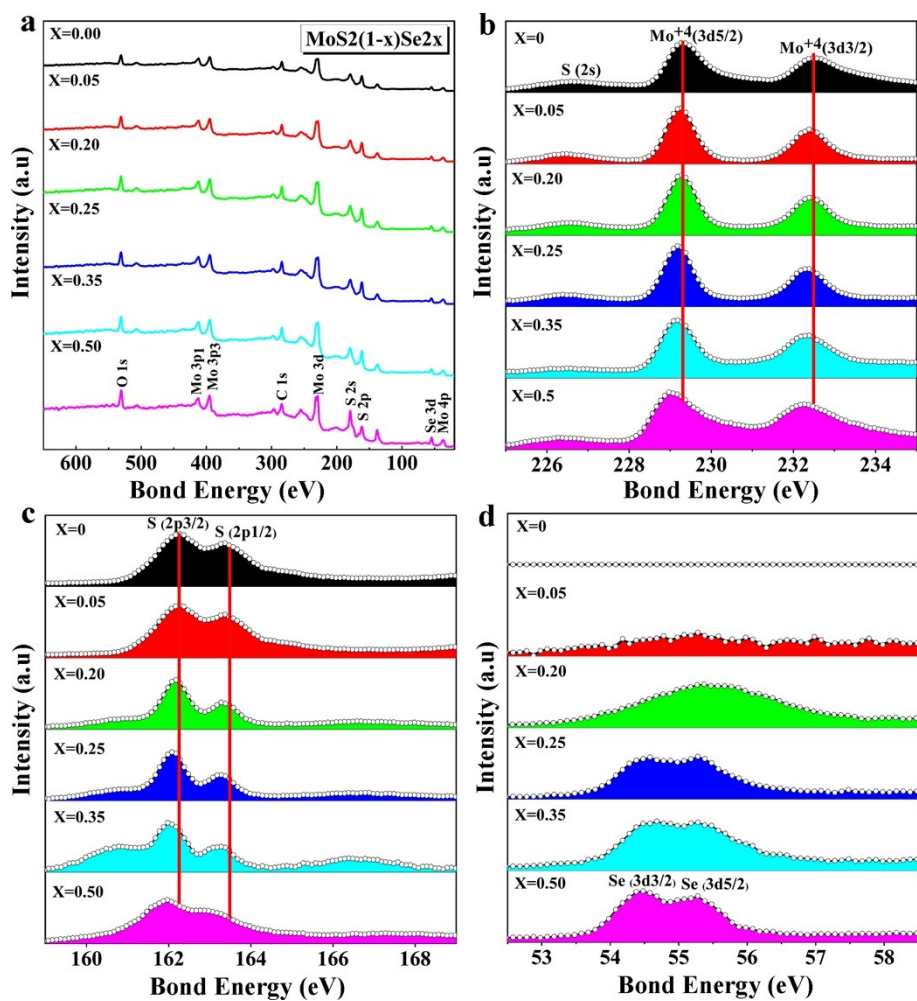

**Figure S7** a) XPS full spectra and b-d) XPS high-resolution spectra Mo 3d, S 2p and Se 3d of the different selenium content of the MoS<sub>2</sub>(1-x)Se<sub>2x</sub> nanosheets.

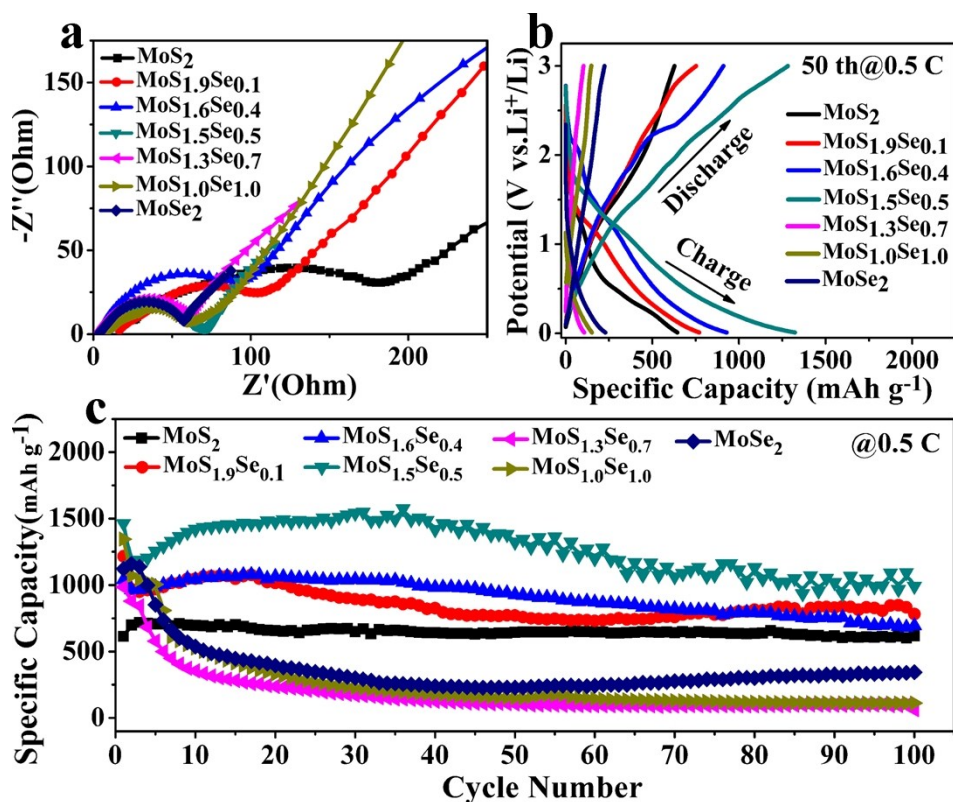

**Figure S8** Electrochemical performance of different proportions of selenium content. a) AC impedance spectrum, b) Galvanostatic charge-discharge voltage profiles for the 50th cycles at a current density of 0.5C, c) Initial 100 cycling performance at 0.5C for MoS<sub>2(1-x)</sub>Se<sub>2x</sub> nanosheets with different proportions of selenium content.

**Table S1** Formation Energies (in eV) of the  $\text{MoS}_{2(1-x)}\text{Se}_{2x}$  Alloys with Different Se Contents.

|    |   |        |        |      |         |      |
|----|---|--------|--------|------|---------|------|
| X  | 0 | 0.0625 | 0.1875 | 0.25 | 0.34375 | 0.5  |
| Ef | 0 | 0.56   | 1.78   | 2.38 | 3.38    | 4.96 |

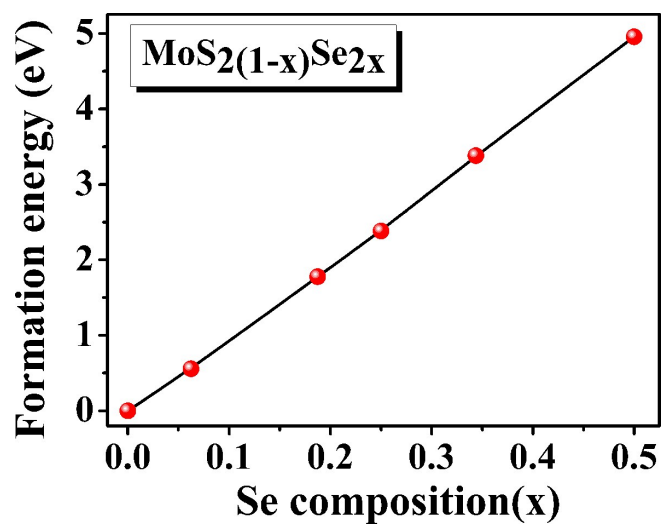

**Figure S9** Formation energy (eV) change diagram of different selenium content.

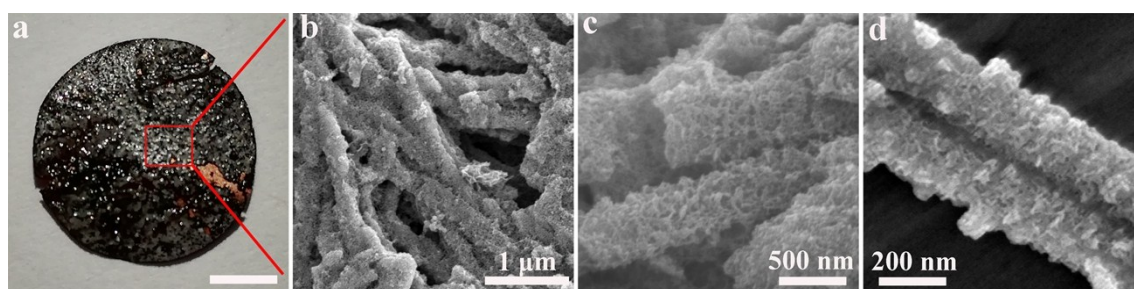

**Figure S10** a-d) Camera photo and FESEM images of the  $\text{MoS}_{2(1-x)}\text{Se}_{2x}$  ( $x=0.25$ ) nanosheets after cycle, which proves the structure was robust enough and could still keep their structure even after 100 cycles.

**Table S2** Summary of lithium-ion battery performance of the reported MoS<sub>2</sub>-based electrode materials.

| Electrodes                                                            | Method                     | Current density                        | Specific capacity                                | Ref |
|-----------------------------------------------------------------------|----------------------------|----------------------------------------|--------------------------------------------------|-----|
| 1T @2H MoS <sub>2</sub> /carbon cloth                                 | Solvothermal               | 2 A g <sup>-1</sup>                    | 510 mA h g <sup>-1</sup><br>(after 500 cycles)   | 1   |
| 2H MoS <sub>2</sub> /graphene                                         | Lithium intercalation      | 0.4 A g <sup>-1</sup>                  | 450 mA h g <sup>-1</sup><br>(over 500 cycles)    | 2   |
| Carbon@MoS <sub>2</sub> tube sponges                                  | Solvothermal               | 0.1 A g <sup>-1</sup>                  | 740 mA h g <sup>-1</sup><br>(after 100 cycles)   | 3   |
| 2H MoS <sub>2</sub> @carbon                                           | PANI assisted hydrothermal | 0.1 A g <sup>-1</sup>                  | 952.6 mA h g <sup>-1</sup><br>(after 50 cycles)  | 4   |
| MoS <sub>2</sub> @MoO <sub>3</sub>                                    | Hydrothermal               | 0.1 A g <sup>-1</sup>                  | 781 mA h g <sup>-1</sup><br>(after 100 cycles)   | 5   |
| Quasi-hollow MoS <sub>2</sub> microspheres encapsulated porous carbon | Hydrothermal               | 1 A g <sup>-1</sup>                    | 670 mA h g <sup>-1</sup><br>(after 100 cycles)   | 6   |
| Reduced graphene oxide/MoS <sub>2</sub> nanoflowers                   | Hydrothermal               | 0.5 A g <sup>-1</sup>                  | 680 mA h g <sup>-1</sup><br>(after 250 cycles)   | 7   |
| Carbon-sandwiched monolayered MoS <sub>2</sub>                        | Hydrothermal               | 0.1 A g <sup>-1</sup>                  | 807 mA h g <sup>-1</sup><br>(after 100 cycles)   | 8   |
| C@MoS <sub>2</sub> @C sandwiched hollow spheres                       | Template method            | 0.1 C<br>(C~670 mA h g <sup>-1</sup> ) | 856.7 mA h g <sup>-1</sup><br>(after 100 cycles) | 9   |
| Hollow microsphere@onion-like solid nanosphere MoS <sub>2</sub>       | Hydrothermal               | 0.1 A g <sup>-1</sup>                  | 878 mA h g <sup>-1</sup><br>(after 100 cycles)   | 10  |
| MoS <sub>2</sub> @carbon microspheres                                 | Hydrothermal               | 1 A g <sup>-1</sup>                    | 650 mA h g <sup>-1</sup><br>(after 300 cycles)   | 11  |
| TiO <sub>2</sub> @carbon@MoS <sub>2</sub> hierarchical nanotubes      | Hydrothermal               | 0.2 A g <sup>-1</sup>                  | 770 mA h g <sup>-1</sup><br>(after 100 cycles)   | 12  |
| MoS <sub>2</sub> @carbon hybridfibers                                 | Hydrothermal               | 0.1 A g <sup>-1</sup>                  | 869 mA h g <sup>-1</sup><br>(after 100 cycles)   | 13  |

|                                                                   |                |                                       |                                                 |                  |
|-------------------------------------------------------------------|----------------|---------------------------------------|-------------------------------------------------|------------------|
| N-rGO/MoS <sub>2</sub> /N-rGO                                     | Solvothermal   | 0.1 A g <sup>-1</sup>                 | 750 mA h g <sup>-1</sup><br>(after 100 cycles)  | 14               |
|                                                                   |                | 1 A g <sup>-1</sup>                   | 552 mA h g <sup>-1</sup><br>(after 600 cycles)  |                  |
| G/MoS <sub>2</sub>                                                | Exfoliation    | 0.1 A g <sup>-1</sup>                 | 931 mA h g <sup>-1</sup><br>(after 100 cycles)  | 15               |
|                                                                   |                | 1 A g <sup>-1</sup>                   | 340 mA h g <sup>-1</sup><br>(after 300 cycles)  |                  |
| MoS <sub>2(1-x)</sub> Se <sub>2x</sub> (x=0.25)<br><br>nanosheets | Etching method | 0.5C<br>(C=669 mA h g <sup>-1</sup> ) | 1000 mA h g <sup>-1</sup><br>(after 100 cycles) | This<br><br>work |
|                                                                   |                | 5C<br>(C=669 mA h g <sup>-1</sup> )   | 500 mA h g <sup>-1</sup><br>(after 350 cycles)  |                  |

## References

1. T. Wang, C. Sun, M. Yang, G. Zhao, S. Wang, F. Ma, L. Zhang, Y. Shao, Y. Wu, B. Huang and X. Hao, *J. Alloys Compd.*, 2017, **716**, 112-118.
2. Y. Chao, R. Jalili, Y. Ge, C. Wang, T. Zheng, K. Shu and G. G. Wallace, *Adv. Funct. Mater.*, 2017, **27**, 1700234.
3. Y. Wang, Z. Ma, Y. Chen, M. Zou, M. Yousaf, Y. Yang, L. Yang, A. Cao and R. P. S. Han, *Adv. Mater.*, 2016, **28**, 10175-10181.
4. L. Yang, S. Wang, J. Mao, J. Deng, Q. Gao, Y. Tang and O. G. Schmidt, *Adv. Mater.*, 2013, **25**, 1180-1184.
5. H. Liu, X. Chen, L. Deng, M. Ding, J. Li and X. He, *J. Mater. Chem. A*, 2016, **4**, 17764-17772.
6. Z. Wan, J. Shao, J. Yun, H. Zheng, T. Gao, M. Shen, Q. Qu and H. Zheng, *Small*, 2014, **10**, 4975-4981.
7. F. Xiong, Z. Cai, L. Qu, P. Zhang, Z. Yuan, O. K. Asare, W. Xu, C. Lin and L. Mai, *ACS Appl. Mater. Interfaces*, 2015, **7**, 12625-12630.
8. J. Shao, Q. Qu, Z. Wan, T. Gao, Z. Zuo and H. Zheng, *ACS Appl. Mater. Interfaces*, 2015, **7**, 22927-22934.
9. Z. Li, A. Ottmann, T. Zhang, Q. Sun, H.-P. Meyer, Y. Vaynzof, J. Xiang and R. Klingeler, *J. Mater. Chem. A*, 2017, **5**, 3987-3994.
10. B. Guo, K. Yu, H. Song, H. Li, Y. Tan, H. Fu, C. Li, X. Lei and Z. Zhu, *Nanoscale*, 2016, **8**, 420-430.

11. Z. Bai, Y. Zhang, Y. Zhang, C. Guo and B. Tang, *Chem-Eur J*, 2015, **21**, 18187-18191.
12. S. Wang, B. Y. Guan, L. Yu and X. W. Lou, *Adv. Mater.*, 2017, **29**, 1702724.
13. R. Zhou, J.-G. Wang, H. Liu, H. Liu, D. Jin, X. Liu, C. Shen, K. Xie and B. Wei, *Materials*, 2017, **10**, 174.
14. B. Chen, Y. Meng, F. He, E. Liu, C. Shi, C. He, L. Ma, Q. Li, J. Li and N. Zhao, *Nano Energy*, 2017, **41**, 154-163.
15. T. Wang, G. Zhao, C. Sun, L. Zhang, Y. Wu, X. Hao and Y. Shao, *Adv. Mater. Interfaces.*, 2017, **4**, 1601187.
16. Kresse, G.; Furthmüller, J., Efficiency of Ab-Initio Total Energy Calculations for Metals and Semiconductors Using a Plane-Wave Basis Set. *Computational materials science*, 1996, **6**, 15-50.
17. Kresse, G.; Hafner, J., Ab Initio Molecular Dynamics for Liquid Metals. *Physical Review B*, **1993**, **47**, 558.
18. Blöchl, P. E., Projector Augmented-Wave Method. *Physical review B*, 1994, **50**, 17953.
19. Perdew, J. P.; Chevary, J. A.; Vosko, S. H.; Jackson, K. A.; Pederson, M. R.; Singh, D. J.; Fiolhais, C., Atoms, Molecules, Solids, and Surfaces: Applications of the Generalized Gradient Approximation for Exchange and Correlation. *Physical Review B*, 1992, **46**, 6671.
20. Perdew, J. P.; Wang, Y., Accurate and Simple Analytic Representation of the Electron-Gas Correlation Energy. *Physical Review B*, 1992, **45**, 13244.
21. Monkhorst, H. J.; Pack, J. D., Special Points for Brillouin-Zone Integrations. *Physical review B*, 1976, **13**, 5188.
